# Supplementary material
Source: publisher figshare collection journal article supplement (https://rs.figshare.com/ndownloader/files/13192724)
Supplement: Supplementary file 1 [file 13192724]

**Supplemental Information for Philosophical Transactions of the Royal Society B: Biological Sciences**

**Title**

Botanic gardens are an untapped resource for studying the functional traits of tropical plants

**Authors**

Timothy M. Perez1,2*, Oscar Valverde-Barrantes3, Catherine Bravo1,2, Tyeen C. Taylor1,2, Belén Fadrique1, J. Aaron Hogan3, Christine J. Pardo1,2, James T. Stroud2,4 Christopher Baraloto3, and Kenneth J. Feeley1,2*

1Department of Biology, University of Miami, Coral Gables, FL 33146, USA

2Fairchild Tropical Botanic Garden, Coral Gables, FL 33156, USA

3International Center for Tropical Botany, Department of Biological Sciences, Florida International University, Miami, FL 33199, USA

4Department of Biology, Washington University in St. Louis, St. Louis, MO, 63130, USA

*Corresponding Authors: t.more.perez@gmail.com and kjfeeley@gmail.com

*Supplementary Figures:*

**
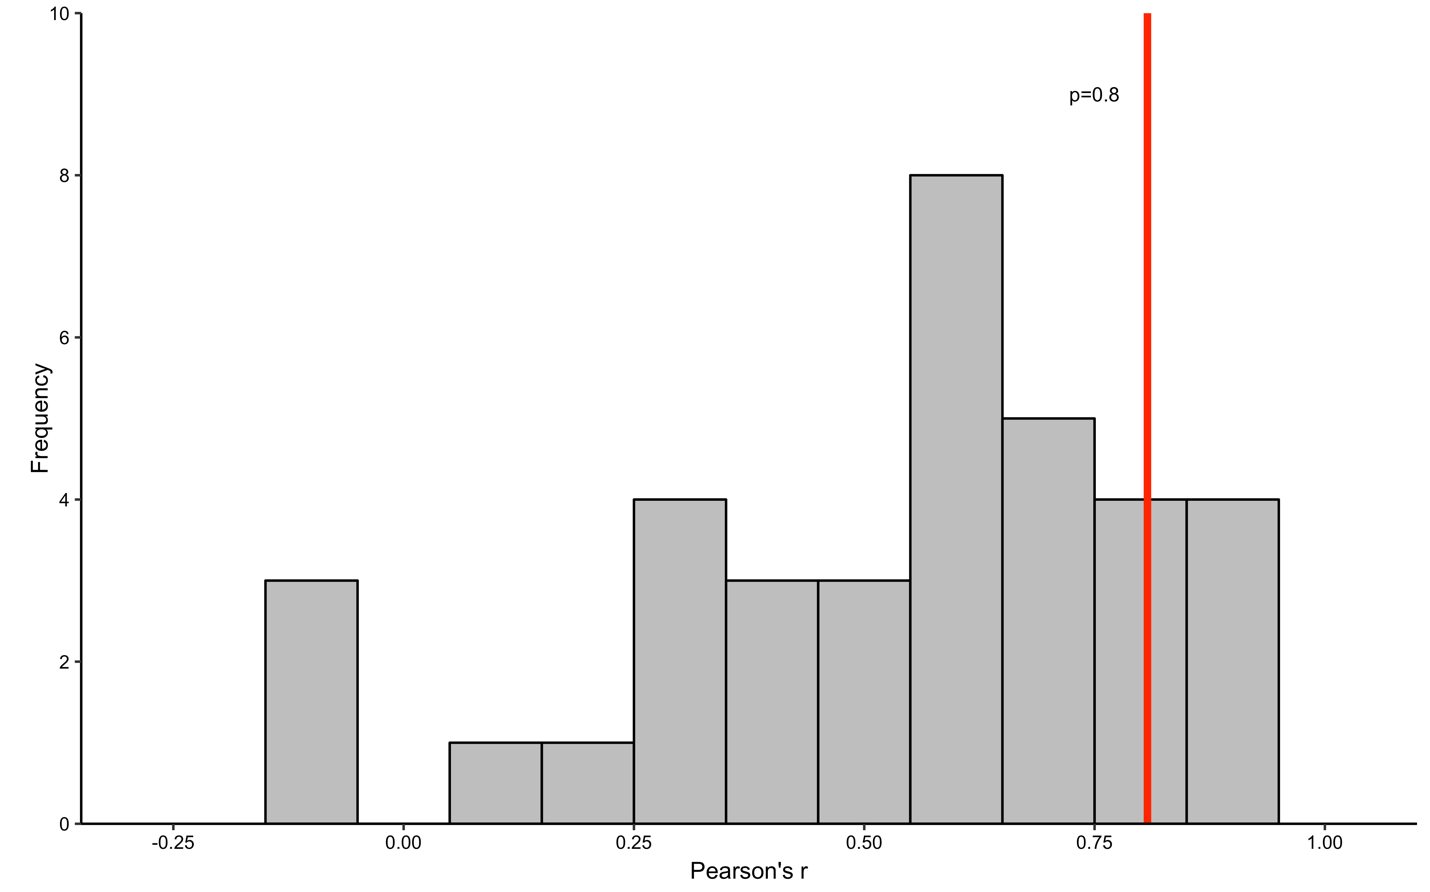
**

Figure S1: The distribution of coefficients of correlation between mean LMA for datasets excised from TRY and corresponding values within TRY (gray bars). The vertical red line shows the coefficient of correlation between species’ mean LMA from FTBG and corresponding values in the TRY database. FTBG data has a higher coefficient of correlation than roughly 80% of the public TRY datasets.


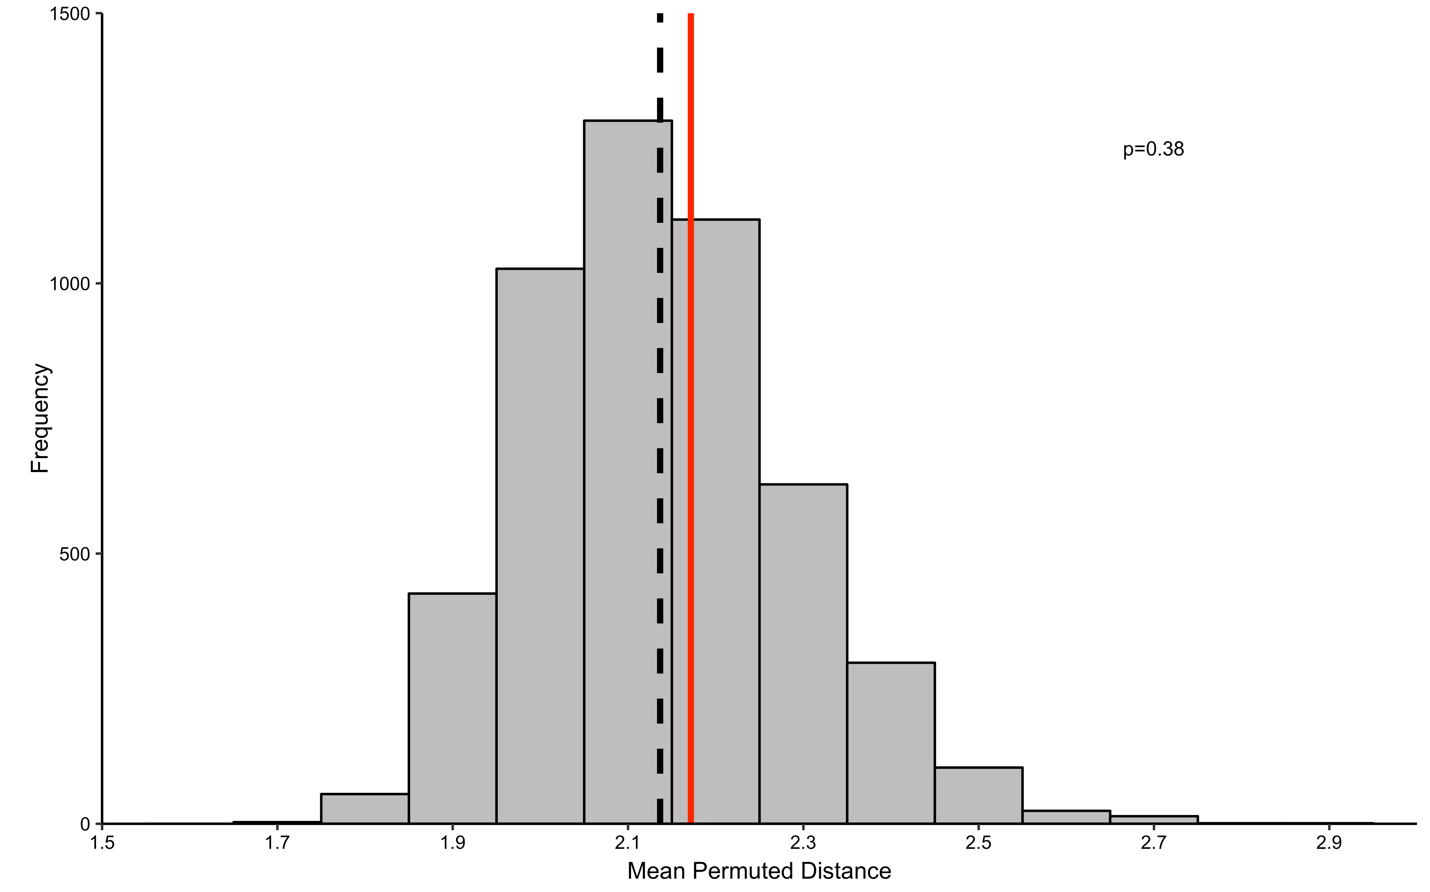


Figure S2: The null distribution of the mean permuted Euclidean distance between resampled leaf traits (gray bars), and the mean (2.17) Euclidean distance between FTBG and Glopnet LES data (red vertical line). The vertical dotted black line indicates the mean of the null distribution (2.14), and the p=0.39 indicates no significant difference in the distribution of Glopnet and FTBG data.


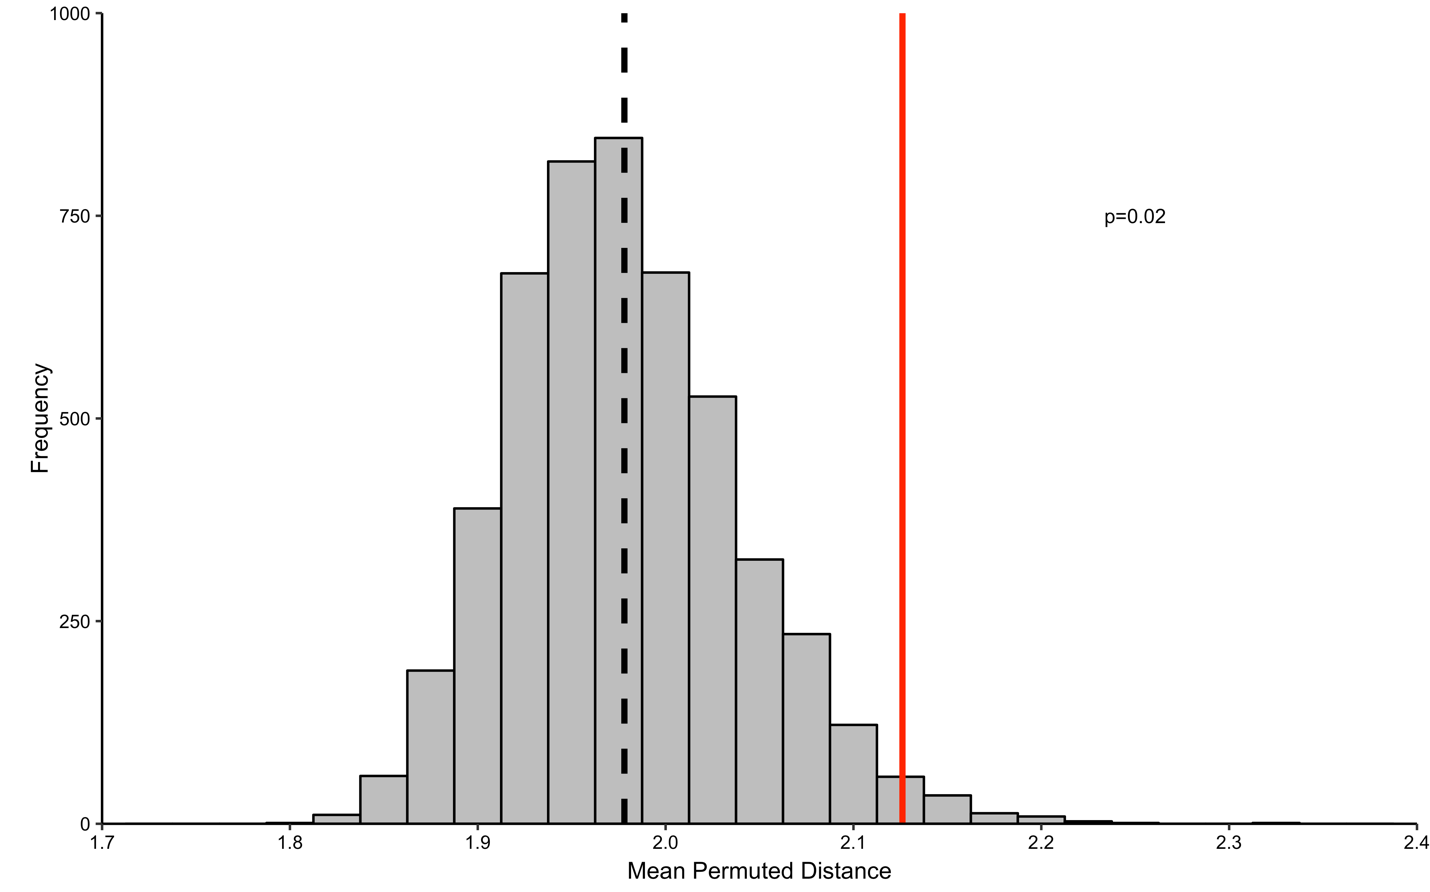


Figure S3: The null distribution of the mean permuted Euclidean distance between resampled root trait data (gray bars), and the mean (2.62) Euclidean distance between FTBG and woody FRED data (red vertical line). The vertical dotted black line indicates the mean of the null distribution (1.99), and the p=0.02 indicating a significant difference in the distribution of FRED and FTBG root traits.


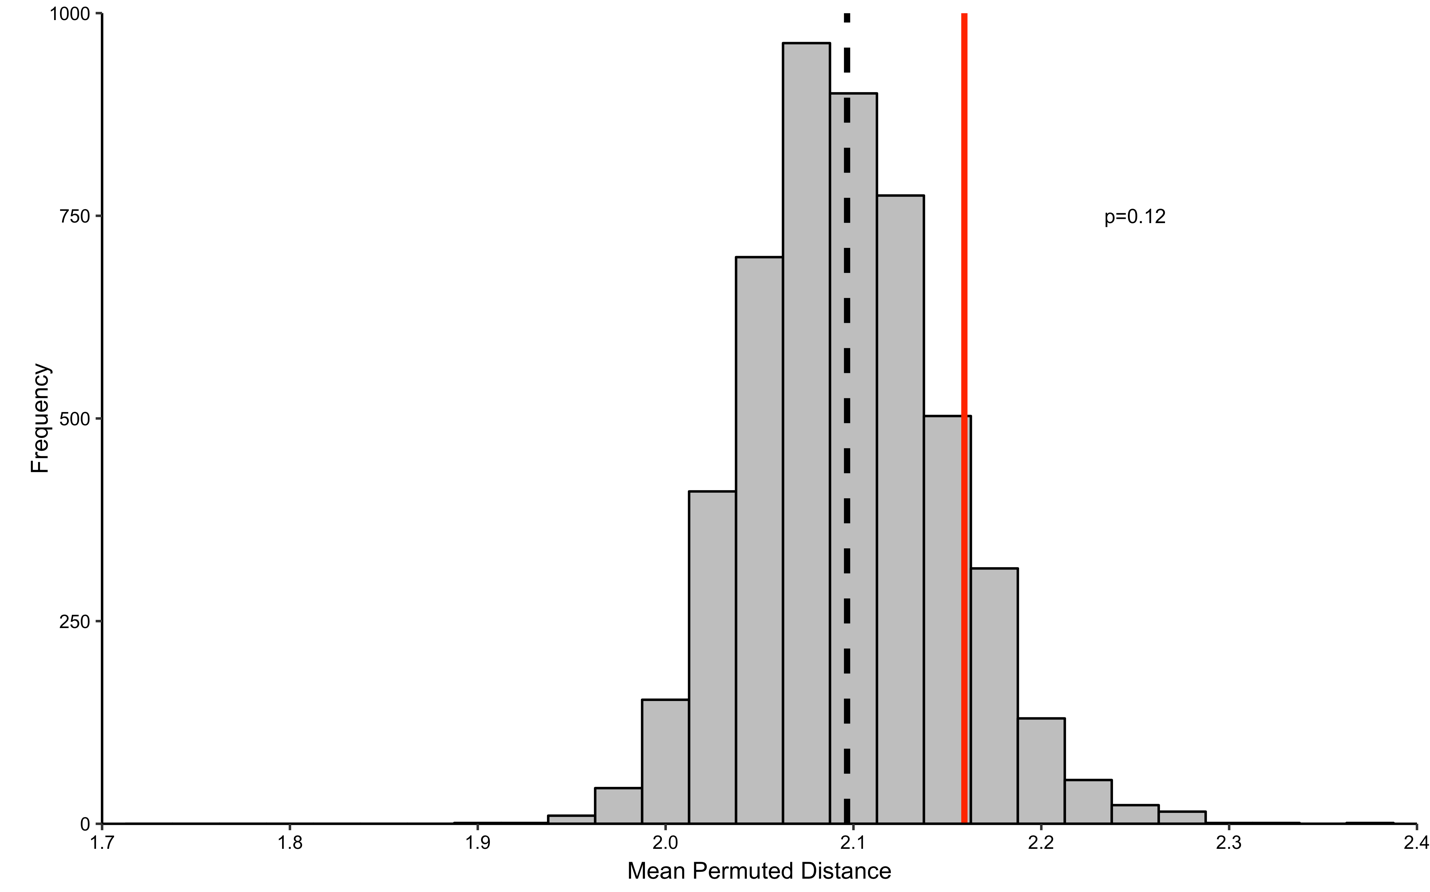


Figure S4: The null distribution of the mean permuted Euclidean distance between resampled root trait data (gray bars), and the mean (2.15) Euclidean distance between FTBG species and woody tropical species from the FRED (red vertical line). The vertical dotted black line indicates the mean of the null distribution (2.1), and the p=0.12 indicating no significant difference in the distribution of FRED and FTBG root traits.

**Table S1**. Summary description of morphological traits for the leaf trait analyzed for 17 tropical woody species studied. Mean values and standard deviation (SD) calculated for leaf mass area (LMA), and percent leaf nitrogen (N), and the assimilation rate (A used to calculate Amax ) values of each species. All measurements were done on species grown at Fairchild Tropical Botanic Garden (FTBG).

| Species | Family | Garden | LMA (g/cm2) | LMA SD | N (%) | N SD | A (μmol m-2s-1) | A SD |
| --- | --- | --- | --- | --- | --- | --- | --- | --- |
| Brosimum alicastrum | Moraceae | FTBG | 122.79 | 12.86 | 2.52 | 0.33 | 6.90 | 4.48 |
| Bulnesia arborea | Zygophyllaceae | FTBG | 101.29 | 10.44 | 3.18 | 0.19 | 4.17 | 2.54 |
| Bursera simaruba | Burseraceae | FTBG | 83.33 | 13.48 | 1.77 | 0.23 | 7.19 | 2.81 |
| Callicarpa americana | Lamiaceae | FTBG | 65.28 | 10.89 | 2.45 | NA | 11.39 | 0.45 |
| Ceiba pentandra | Malvaceae | FTBG | 88.54 | 19.89 | 2.37 | 0.12 | 8.47 | 1.54 |
| Couroupita guianensis | Lecythidaceae | FTBG | 45.95 | 19.21 | 3.58 | 1.12 | 3.49 | 1.33 |
| Dodonaea viscosa | Sapindaceae | FTBG | 63.53 | 2.82 | 2.07 | 0.07 | 4.77 | 5.43 |
| Enterolobium cyclocarpum | Fabaceae | FTBG | 108.75 | 17.12 | 2.61 | 0.46 | 2.19 | 2.04 |
| Ficus benghalensis | Moraceae | FTBG | 185.69 | 116.61 | 1.63 | NA | 12.24 | 0.22 |
| Hamelia patens | Rubiaceae | FTBG | 56.35 | 20.39 | 3.56 | 0.56 | 11.24 | 0.56 |
| Myrica cerifera | Myricaceae | FTBG | 83.93 | NA | 1.38 | NA | NA | NA |
| Polyalthia longifolia | Annonaceae | FTBG | 65.99 | 14.52 | 3.02 | 0.23 | 6.29 | 2.17 |
| Psychotria viridis | Rubiaceae | FTBG | 49.98 | 2.25 | 2.21 | 0.18 | NA | NA |
| Quercus virginiana | Fagaceae | FTBG | 149.04 | 5.61 | 1.90 | 0.08 | 4.77 | 2.48 |
| Tabebuia impetiginosa | Bignoniaceae | FTBG | 64.15 | 17.68 | 2.87 | 0.39 | NA | NA |
| Taxodium distichum | Cupressaceae | FTBG | 147.03 | NA | 1.54 | NA | NA | NA |
| Trachelospermum jasminoides | Apocynaceae | FTBG | 89.01 | 20.66 | 2.52 | 0.38 | 9.83 | 2.73 |

**Table S2**. Summary description of morphological traits for the entire root systems (ERS) analyzed for 70 tropical woody species studied. Mean values and standard deviation (SD) calculated from specific root length (SRL), first order diameter (D) and root tissue density (RTD) values of each species. Acronyms for the gardens visited correspond with Fairchild Tropical Botanical Garden (FTBG), Kampong Botanical Garden (KBG) and the Chapman Field (CF) in the facilities of the USDA, Miami.

| Species | Family | Garden | ERS | SRL (m/g) | SRL SD | D (mm) | Diam. SD | RTD (g/cm3) | RTD SD |
| --- | --- | --- | --- | --- | --- | --- | --- | --- | --- |
| *Adansonia_digitata* | Malvaceae | KBG | 3 | 3.40 | 0.92 | 0.70 | 0.06 | 0.47 | 0.05 |
| *Aglaia odorata* | Meliaceae | KBG | 3 | 24.76 | 17.12 | 0.35 | 0.05 | 0.41 | 0.30 |
| *Alstonia_scholaris* | Apocynaceae | FTBG | 3 | 17.13 | 2.50 | 0.57 | 0.02 | 0.14 | 0.02 |
| *Artrocarpus_nitidus* | Moraceae | CF | 4 | 24.29 | 6.00 | 0.41 | 0.02 | 0.22 | 0.05 |
| *Atrocarpus_altilis* | Moraceae | KBG | 5 | 33.48 | 7.18 | 0.35 | 0.03 | 0.25 | 0.03 |
| *Banara_vanderbiltii* | Salicaceae | KBG | 3 | 10.15 | 6.18 | 0.30 | 0.08 | 0.61 | 0.15 |
| *Brosimum_alicastrum* | Moraceae | FTBG, KBG | 11 | 6.86 | 2.71 | 0.40 | 0.12 | 0.61 | 0.06 |
| *Bulnesia_arborea* | Zygophyllaceae | FTBG | 3 | 11.05 | 1.64 | 0.37 | 0.02 | 0.45 | 0.04 |
| *Bunchosia_argentea* | Malpighiaceae | KBG | 3 | 12.46 | 3.30 | 0.53 | 0.09 | 0.26 | 0.08 |
| *Bursera_simaruba* | Burseraceae | FTBG | 3 | 6.01 | 0.27 | 0.45 | 0.06 | 0.29 | 0.04 |
| *Calliandra_eriophylla* | Fabaceae | KBG | 3 | 7.82 | 2.59 | 0.42 | 0.09 | 0.52 | 0.02 |
| *Callicarpa_americana* | Lamiaceae | FTBG | 3 | 22.98 | 6.20 | 0.43 | 0.08 | 0.17 | 0.01 |
| *Calophyllum_antillanum* | Calophyllaceae | CF | 4 | 5.33 | 3.18 | 0.45 | 0.16 | 0.58 | 0.08 |
| *Calophyllum_brasiliense* | Calophyllaceae | CF | 5 | 9.09 | 2.13 | 0.36 | 0.04 | 0.47 | 0.07 |
| *Calyptranthes_pallens* | Myrtaceae | FTBG | 3 | 6.52 | 2.19 | 0.37 | 0.02 | 0.57 | 0.19 |
| *Cameraria_retusa* | Apocynaceae | FTBG | 3 | 5.82 | 3.45 | 0.54 | 0.14 | 0.36 | 0.07 |
| *Ceiba_pentandra* | Malvaceae | FTBG | 3 | 4.45 | 2.54 | 0.67 | 0.13 | 0.25 | 0.05 |
| *Ceiba_speciosa* | Malvaceae | KBG | 3 | 6.50 | 4.92 | 0.56 | 0.06 | 0.43 | 0.13 |
| *Clausena_lansium* | Rutaceae | KBG | 3 | 11.38 | 8.02 | 0.37 | 0.06 | 0.44 | 0.16 |
| *Clusia_rosea* | Clusiaceae | FTBG | 5 | 3.72 | 0.98 | 0.85 | 0.09 | 0.36 | 0.04 |
| *Cnidoscolus_aconitifolius* | Euphorbiaceae | FTBG | 5 | 16.97 | 4.75 | 0.53 | 0.08 | 0.20 | 0.03 |
| *Coccoloba_uvifera* | Polygonaceae | KBG | 3 | 12.50 | 4.43 | 0.32 | 0.07 | 0.55 | 0.06 |
| *Cordia_alliodora* | Boraginaceae | KBG | 3 | 3.70 | 0.91 | 0.46 | 0.08 | 0.47 | 0.03 |
| *Couroupita_guianensis* | Lecythidaceae | FTBG, KBG | 6 | 6.60 | 1.87 | 0.56 | 0.04 | 0.33 | 0.09 |
| *Diospyros_digyna* | Ebenaceae | KBG | 3 | 8.84 | 1.52 | 0.67 | 0.02 | 0.23 | 0.05 |
| *Dodonaea_viscosa* | Sapindaceae | FTBG | 4 | 16.99 | 4.84 | 0.38 | 0.03 | 0.33 | 0.07 |
| *Enterolobium_cyclocarpum* | Fabaceae | FTBG | 3 | 15.10 | 1.18 | 0.51 | 0.01 | 0.18 | 0.01 |
| *Erithalis_fruticosa* | Rubiaceae | FTBG | 3 | 11.12 | 3.86 | 0.39 | 0.05 | 0.39 | 0.06 |
| *Eugenia_umbellifera* | Myrtaceae | KBG | 3 | 10.41 | 2.94 | 0.30 | 0.00 | 0.62 | 0.16 |
| *Ficus_benghalensis* | Moraceae | KBG | 3 | 3.94 | 1.64 | 0.46 | 0.11 | 0.52 | 0.26 |
| *Finschia_chloroxantha* | Proteaceae | FTBG | 3 | 15.30 | 5.17 | 0.39 | 0.05 | 0.30 | 0.09 |
| *Guaiacum_sanctum* | Zygophyllaceae | FTBG | 3 | 8.16 | 5.43 | 0.41 | 0.12 | 0.53 | 0.12 |
| *Hamelia_patens* | Rubiaceae | FTBG | 3 | 44.28 | 8.12 | 0.28 | 0.03 | 0.14 | 0.04 |
| *Handroanthus_chrysanthus* | Bignonaceae | FTBG, KBG | 6 | 7.50 | 5.02 | 0.67 | 0.10 | 0.29 | 0.15 |
| *Hevea_brasiliensis* | Euphorbiaceae | CF | 4 | 3.86 | 0.44 | 0.52 | 0.10 | 0.43 | 0.06 |
| *Lysiloma_latisiliquum* | Fabaceae | FTBG | 3 | 7.57 | 4.13 | 0.38 | 0.12 | 0.31 | 0.14 |
| *Magnolia_chapensis* | Magnoliaceae | KBG | 3 | 2.64 | 0.98 | 0.66 | 0.03 | 0.45 | 0.07 |
| *Magnolia_yunnanensis* | Magnoliaceae | KBG | 3 | 5.47 | 0.98 | 0.61 | 0.07 | 0.29 | 0.03 |
| *Malpighia_emarginata* | Malpighiaceae | KBG | 3 | 9.21 | 3.66 | 0.46 | 0.10 | 0.31 | 0.16 |
| *Mayodendron_igneum* | Bignonaceae | KBG | 3 | 1.77 | 1.40 | 0.39 | 0.17 | 0.50 | 0.21 |
| *Millingtonia_hortensis* | Bignonaceae | KBG | 3 | 7.48 | 1.88 | 0.33 | 0.01 | 0.43 | 0.09 |
| *Mimusops_elengi* | Sapotaceae | CF | 5 | 6.42 | 1.89 | 0.43 | 0.03 | 0.72 | 0.10 |
| *Moringa_oleifera* | Moringaceae | KBG | 3 | 6.19 | 3.87 | 0.50 | 0.07 | 0.27 | 0.08 |
| *Morus_macroura* | Moraceae | KBG | 5 | 30.07 | 10.70 | 0.27 | 0.02 | 0.44 | 0.10 |
| *Myrcianthes_cauliflora* | Myrtaceae | FTBG | 3 | 7.36 | 2.02 | 0.30 | 0.06 | 0.76 | 0.01 |
| *Myrica_cerifera* | Myricaceae | FTBG | 3 | 42.08 | 6.26 | 0.31 | 0.02 | 0.14 | 0.02 |
| *Palaquium_gupta* | Sapotaceae | CF | 5 | 8.49 | 4.26 | 0.36 | 0.08 | 0.55 | 0.08 |
| *Peltophorum_peltatum* | Fabaceae | KBG | 3 | 3.24 | 1.08 | 0.50 | 0.10 | 0.63 | 0.05 |
| *Persea_americana* | Lauraceae | KBG | 3 | 6.62 | 4.69 | 0.77 | 0.21 | 0.25 | 0.04 |
| *Pleiogynium_timoriense* | Anacardiaceae | KBG | 3 | 10.04 | 5.70 | 0.30 | 0.15 | 0.45 | 0.06 |
| *Plumeria_obtusa* | Apocynaceae | KBG | 3 | 2.49 | 2.26 | 0.94 | 0.04 | 0.24 | 0.05 |
| *Plumeria_rubra* | Apocynaceae | FTBG | 3 | 7.85 | 2.05 | 0.90 | 0.03 | 0.15 | 0.04 |
| *Polyanthia_longifolia* | Annonaceae | FTBG, KBG | 6 | 5.85 | 3.57 | 0.81 | 0.15 | 0.25 | 0.07 |
| *Pouteria_campechiana* | Sapotaceae | KBG | 3 | 11.98 | 4.76 | 0.51 | 0.10 | 0.26 | 0.01 |
| *Pseudobombax_septenatum* | Malvaceae | KBG | 3 | 5.38 | 5.02 | 0.58 | 0.20 | 0.48 | 0.12 |
| *Psychotria_viridis* | Rubiaceae | FTBG | 3 | 35.30 | 1.99 | 0.36 | 0.03 | 0.17 | 0.02 |
| *Quercus_virginiana* | Fagaceae | FTBG | 3 | 12.15 | 6.27 | 0.36 | 0.12 | 0.44 | 0.07 |
| *Randia_armata* | Rubiaceae | KBG | 3 | 6.44 | 1.83 | 0.36 | 0.04 | 0.71 | 0.09 |
| *Reutealis_trisperma* | Euphorbiaceae | CF | 5 | 6.12 | 1.29 | 0.61 | 0.06 | 0.42 | 0.08 |
| *Sapindus_saponaria* | Sapindaceae | FTBG | 3 | 7.57 | 4.38 | 0.62 | 0.08 | 0.21 | 0.11 |
| *Schizolobium_parahyba* | Fabaceae | KBG | 3 | 6.69 | 1.16 | 0.45 | 0.07 | 0.45 | 0.04 |
| *Spathodea_campanulata* | Bignonaceae | KBG | 3 | 6.56 | 4.12 | 0.43 | 0.05 | 0.42 | 0.18 |
| *Spondias_purpurea* | Anacardiaceae | KBG | 3 | 8.97 | 2.63 | 0.44 | 0.11 | 0.32 | 0.03 |
| *Stemmadenia_alfaroi* | Apocynaceae | KBG | 3 | 19.29 | 14.77 | 0.42 | 0.12 | 0.27 | 0.18 |
| *Streblus_asper* | Moraceae | CF | 4 | 12.58 | 3.39 | 0.39 | 0.04 | 0.40 | 0.04 |
| *Swinglea_glutinosa* | Rutaceae | KBG | 3 | 15.21 | 6.05 | 0.38 | 0.08 | 0.34 | 0.09 |
| *Tabebuia_rosea* | Bignonaceae | FTBG | 3 | 22.30 | 4.83 | 0.52 | 0.10 | 0.14 | 0.01 |
| *Tamarindus_indica* | Fabaceae | KBG | 3 | 9.69 | 3.48 | 0.31 | 0.05 | 0.67 | 0.08 |
| *Taxodium_distichum* | Cupressaceae | FTBG | 3 | 11.84 | 6.22 | 0.53 | 0.06 | 0.22 | 0.06 |
| *Triplaris_cumingiana* | Polygonaceae | FTBG | 6 | 7.86 | 2.60 | 0.30 | 0.08 | 0.52 | 0.10 |
